# Supplementary material
Source: PubMed Central journal article supplement (PMC1088806)
Supplement: PB011759s01.pdf [file PB011759s01.pdf]

This is an electronic appendix to the paper by van Oppen *et al* 2001 (Patterns of coral–dinoflagellate associations in *Acropora*: significance of local availability and physiology of *Symbiodinium* strains and host–symbiont selectivity). *Proc. R. Soc. Lond. B* **268**, 1759–1767.

Electronic appendices are refereed with the text. However, no attempt has been made to impose a uniform editorial style on the electronic appendices.

Appendix A:

Host species, sample code, sampling site, year of collection and *Symbiodinium* strain as identified by sequence and SSCP analysis of the rDNA ITS1 region. A question mark after the species name indicates that the identification was not unequivocal. If no details are given as to which part of the colony was sampled, this had not been recorded. The methods of data acquisition (SSCP or sequencing (Seq)) is also indicated. Sample numbers followed by a dot and a number (e.g. M215.2) refer to sequences from cloned material (M215, clone 2). Cases of double peaks in the ITS1 sequence chromatogram (i.e. possibly a mix of zooxanthella strains) are indicated as follows: • = Y (C or T) at alignment position 127, ♠ = W (A or T) at alignment position 163, ◆ = M (A or C) at alignment position 249, ♣ = R (A or G) at alignment position 284. i.s. = irradiated side, s.s. = shaded side, WA = Western Australia.

| <b>Zoox strain C2</b> |                    |                                |               |                         |                        |             |
|-----------------------|--------------------|--------------------------------|---------------|-------------------------|------------------------|-------------|
| <b>species</b>        | <b>sample code</b> | <b>sample from same colony</b> | <b>method</b> | <b>accession number</b> | <b>collection site</b> | <b>year</b> |
| A. aspera             | M84                |                                | Seq           |                         | Bundegi WA             | 1998        |
| A. aspera             | M85                |                                | SSCP          |                         | Bundegi WA             | 1998        |
| A. aspera             | M86                |                                | SSCP          |                         | Bundegi WA             | 1998        |
| A. aspera             | M87                |                                | SSCP          |                         | Bundegi WA             | 1998        |
| A. aspera             | M88                |                                | Seq           |                         | Bundegi WA             | 1998        |
| A. aspera             | M92                |                                | SSCP          |                         | Pelorus                | 1997        |
| A. aspera             | M93                |                                | SSCP          |                         | Pelorus                | 1997        |
| A. aspera             | M94                |                                | SSCP          |                         | Pelorus                | 1997        |
| A. aspera             | M95                |                                | SSCP          |                         | Pelorus                | 1997        |
| A. aspera             | M96                |                                | SSCP          |                         | Pelorus                | 1997        |
| A. cerealis           | J113               |                                | SSCP          |                         | Trunk                  | 1998        |
| A. cerealis           | J114               |                                | SSCP          |                         | Trunk                  | 1998        |
| A. cerealis           | J115               |                                | SSCP          |                         | Trunk                  | 1998        |
| A. cerealis           | J116               |                                | SSCP          |                         | Trunk                  | 1998        |
| A. cerealis           | J117               |                                | SSCP          |                         | Trunk                  | 1998        |
| A. cuneata • ♣        | J48                |                                | Seq           |                         | Britomart              | 1998        |
| A. cuneata • ♣        | J50                |                                | Seq           |                         | Britomart              | 1998        |
| A. cuneata            | J51                |                                | SSCP          |                         | Britomart              | 1998        |
| A. florida            | J104               |                                | SSCP          |                         | Trunk                  | 1998        |
| A. florida ▲          | J105               |                                | Seq           |                         | Trunk                  | 1998        |
| A. gemmifera •        | J93                |                                | Seq           |                         | Trunk                  | 1998        |
| A. gemmifera ♣        | J94                |                                | Seq           |                         | Trunk                  | 1998        |

|                         |      |      |      |                        |      |
|-------------------------|------|------|------|------------------------|------|
| A. gemmifera            | J95  |      | SSCP | Trunk                  | 1998 |
| A. gemmifera            | J96  |      | SSCP | Trunk                  | 1998 |
| A. humilis              | J188 |      | SSCP | Trunk                  | 1998 |
| A. humilis              | J189 |      | Seq  | Trunk                  | 1998 |
| A. intermedia           | M213 |      | SSCP | Pelorus                | 2000 |
| A. intermedia           | M218 |      | Seq  | Pelorus                | 2000 |
| A. intermedia (s.s.)    | M247 | M246 | SSCP | Pioneer Bay            | 2000 |
| A. intermedia (i.s.)    | M246 | M247 | SSCP | Pioneer Bay            | 2000 |
| A. longicyathus •       | J84  |      | Seq  | Trunk                  | 1998 |
| A. longicyathus ♠ ♦     | J85  |      | Seq  | Trunk                  | 1998 |
| A. longicyathus ♣       | J89  |      | Seq  | Trunk                  | 1998 |
| A. longicyathus • ♣     | J90  |      | Seq  | Trunk                  | 1998 |
| A. longicyathus ♠ ♦     | J91  |      | Seq  | Trunk                  | 1998 |
| A. longicyathus         | J92  |      | SSCP | Trunk                  | 1998 |
| A. longicyathus         | M221 |      | SSCP | Pelorus                | 2000 |
| A. loripes              | J144 |      | SSCP | Trunk                  | 1998 |
| A. loripes              | J146 |      | SSCP | Trunk                  | 1998 |
| A. loripes              | J147 |      | SSCP | Trunk                  | 1998 |
| A. millepora            | A5   |      | Seq  | Pelorus                | 1997 |
| A. millepora            | A7   |      | Seq  | Pelorus                | 1997 |
| A. millepora            | M12  |      | Seq  | Orpheus                | 1997 |
| A. millepora            | M2   |      | SSCP | Orpheus                | 1997 |
| A. millepora            | M29  |      | SSCP | Heron                  | 1997 |
| A. millepora            | M5   |      | SSCP | Lizard                 | 1997 |
| A. millepora (s.s.)     | M249 | M248 | SSCP | Pioneer Bay            | 2000 |
| A. millepora (s.s.)     | M25  |      | SSCP | Heron                  | 1997 |
| A. millepora (i.s.)     | M248 | M249 | SSCP | Pioneer Bay, reef flat | 2000 |
| A. millepora (i.s.)     | M269 |      | SSCP | Pioneer Bay, reef flat | 2000 |
| A. millepora (i.s.)     | M270 |      | SSCP | Pioneer Bay, reef flat | 2000 |
| A. millepora (i.s.)     | M272 |      | SSCP | Pioneer Bay, reef flat | 2000 |
| A. millepora (i.s.)     | M275 |      | SSCP | Pioneer Bay, reef flat | 2000 |
| A. millepora (i.s.)     | M276 |      | SSCP | Pioneer Bay, reef flat | 2000 |
| A. millepora (i.s.)     | M280 |      | Seq  | Pioneer Bay, reef flat | 2000 |
| A. muricata             | J239 |      | SSCP | Trunk                  | 1998 |
| A. muricata             | J240 |      | SSCP | Trunk                  | 1998 |
| A. nasuta               | J124 |      | SSCP | Trunk                  | 1998 |
| A. nasuta               | J125 |      | SSCP | Trunk                  | 1998 |
| A. nasuta               | J126 |      | SSCP | Trunk                  | 1998 |
| A. nasuta               | J136 |      | SSCP | Trunk                  | 1998 |
| A. pulchra              | M82  |      | SSCP | Bundegi WA             | 1998 |
| A. pulchra              | M83  |      | SSCP | Bundegi WA             | 1998 |
| A. sarmentosa           | J153 |      | SSCP | Trunk                  | 1998 |
| A. sarmentosa           | J156 |      | SSCP | Trunk                  | 1998 |
| A. spathulata           | A2   |      | Seq  | Pelorus                | 1997 |
| A. spathulata           | A3   |      | Seq  | Pelorus                | 1997 |
| A. spathulata           | M20  |      | SSCP | Heron                  | 1997 |
| A. tenuis (i.s.)        | M201 | M202 | Seq  | Pioneer Bay            | 2000 |
| A. tenuis (i.s.)        | M203 | M204 | Seq  | Pioneer Bay            | 2000 |
| A. tenuis (i.s.)        | M205 | M206 | Seq  | Pioneer Bay            | 2000 |
| A. tenuis vertical side | M206 | M205 | SSCP | Pioneer Bay            | 2000 |
| A. tenuis (i.s.)        | M207 | M208 | SSCP | Pioneer Bay            | 2000 |
| A. tenuis (i.s.)        | M254 | M255 | SSCP | Pioneer Bay            | 2000 |
| A. tenuis (i.s.)        | M256 | M257 | SSCP | Pioneer Bay            | 2000 |
| A. tenuis (i.s.)        | M258 | M259 | SSCP | Pioneer Bay            | 2000 |

|                                |        |                   |      |                        |      |
|--------------------------------|--------|-------------------|------|------------------------|------|
| <i>A. tenuis</i> (i.s.)        | M262   | M263              | SSCP | Pioneer Bay            | 2000 |
| <i>A. tenuis</i> (i.s.)        | M264   | M265              | SSCP | Pioneer Bay            | 2000 |
| <i>A. tenuis</i> (i.s.)        | M271   |                   | SSCP | Pioneer Bay, reef flat | 2000 |
| <i>A. valida</i> (s.s.)        | M251   | M250              | SSCP | Pioneer Bay            | 2000 |
| <i>A. valida</i> (s.s.)        | M253   | M252              | SSCP | Pioneer Bay            | 2000 |
| <i>A. valida</i> vertical side | M267.2 | M266,<br>M267.1   | Seq  | Pioneer Bay            | 2000 |
| <i>A. valida</i> (i.s.)        | M250   | M251              | SSCP | Pioneer Bay            | 2000 |
| <i>A. valida</i> (i.s.)        | M252   | M253              | SSCP | Pioneer Bay            | 2000 |
| <i>A. valida</i> (i.s.)        | M260   | M261              | SSCP | Pioneer Bay            | 2000 |
| <i>A. valida</i> (i.s.)        | M266   | M267.1,<br>M267.2 | SSCP | Pioneer Bay            | 2000 |
| <i>A. valida</i> (i.s.)        | M277   |                   | Seq  | Pioneer Bay, reef flat | 2000 |
| <b>Zoox strain C1</b>          |        |                   |      |                        |      |
| <i>A. divaricata</i>           | J135   |                   | Seq  | Trunk                  | 1998 |
| <i>A. florida</i>              | J103   |                   | SSCP | Trunk                  | 1998 |
| <i>A. florida</i>              | J107   |                   | SSCP | Trunk                  | 1998 |
| <i>A. humilis</i>              | J190   |                   | Seq  | Trunk                  | 1998 |
| <i>A. hyacinthus?</i> (s.s.)   | M233   | M232              | SSCP | Geoffrey Bay           | 2000 |
| <i>A. hyacinthus?</i> (i.s.)   | M232   | M233              | SSCP | Geoffrey Bay           | 2000 |
| <i>A. hyacinthus?</i> (s.s.)   | M311   | M310              | SSCP | Nelly Bay              | 2000 |
| <i>A. hyacinthus</i> (i.s.)    | M310   | M311              | Seq  | Nelly Bay              | 2000 |
| <i>A. longicyathus</i>         | J83    |                   | Seq  | Trunk                  | 1998 |
| <i>A. longicyathus</i>         | J88    |                   | SSCP | Trunk                  | 1998 |
| <i>A. longicyathus</i>         | M222   |                   | SSCP | Pelorus                | 2000 |
| <i>A. millepora</i> (i.s.)     | M278   |                   | SSCP | Pioneer Bay, reef flat | 2000 |
| <i>A. sarmentosa</i>           | J157   |                   | Seq  | Trunk                  | 1998 |
| <i>A. tenuis</i> (s.s.)        | M202   | M201              | Seq  | Pioneer Bay            | 2000 |
| <i>A. tenuis</i> (s.s.)        | M204   | M203              | SSCP | Pioneer Bay            | 2000 |
| <i>A. tenuis</i> (s.s.)        | M206   | M205              | SSCP | Pioneer Bay            | 2000 |
| <i>A. tenuis</i> (s.s.)        | M208   | M207              | SSCP | Pioneer Bay            | 2000 |
| <i>A. tenuis</i> (s.s.)        | M255   | M254              | SSCP | Pioneer Bay            | 2000 |
| <i>A. tenuis</i> (s.s.)        | M257   | M256              | SSCP | Pioneer Bay            | 2000 |
| <i>A. tenuis</i> (s.s.)        | M259   | M258              | SSCP | Pioneer Bay            | 2000 |
| <i>A. tenuis</i> (s.s.)        | M263   | M262              | SSCP | Pioneer Bay            | 2000 |
| <i>A. tenuis</i> (s.s.)        | M265   | M264              | SSCP | Pioneer Bay            | 2000 |
| <i>A. tenuis</i> (s.s.)        | M299   | M298              | SSCP | Nelly Bay              | 2000 |
| <i>A. tenuis</i> (s.s.)        | M303   | M302              | SSCP | Nelly Bay              | 2000 |
| <i>A. tenuis</i> (i.s.)        | M273   |                   | SSCP | Pioneer Bay, reef flat | 2000 |
| <i>A. tenuis</i> (i.s.)        | M298   | M299              | SSCP | Nelly Bay              | 2000 |
| <i>A. tenuis</i> (i.s.)        | M302   | M303              | SSCP | Nelly Bay              | 2000 |
| <i>A. tenuis</i> (s.s.)        | M235   | M234              | Seq  | Geoffrey Bay           | 2000 |
| <i>A. tenuis?</i> (s.s.)       | M239   | M238              | SSCP | Geoffrey Bay           | 2000 |
| <i>A. tenuis</i> (s.s.)        | M241   | M240              | SSCP | Geoffrey Bay           | 2000 |
| <i>A. tenuis?</i> (s.s.)       | M243   | M242              | SSCP | Geoffrey Bay           | 2000 |
| <i>A. tenuis</i> (i.s.)        | M234   | M235              | SSCP | Geoffrey Bay           | 2000 |
| <i>A. tenuis?</i> (i.s.)       | M238   | M239              | SSCP | Geoffrey Bay           | 2000 |
| <i>A. tenuis</i> (i.s.)        | M240   | M241              | SSCP | Geoffrey Bay           | 2000 |
| <i>A. tenuis?</i> (i.s.)       | M242   | M243              | SSCP | Geoffrey Bay           | 2000 |
| <i>A. valida</i> (i.s.)        | M274   |                   | SSCP | Pioneer Bay, reef flat | 2000 |
| <i>Acropora</i> sp. (s.s.)     | M292   | M293              | SSCP | Nelly Bay              | 2000 |
| <i>Acropora</i> sp. (i.s.)     | M293   | M292              | SSCP | Nelly Bay              | 2000 |

| <b>Zoox strain C3</b> |                   |                   |      |               |      |
|-----------------------|-------------------|-------------------|------|---------------|------|
| A. aculeus?           | M215.2,<br>M215.3 |                   | Seq  | Pelorus       | 2000 |
| A. aculeus?           | M216              |                   | SSCP | Pelorus       | 2000 |
| A. millepora          | M73.3             |                   | Seq  | Coral Bay, WA | 1998 |
| A. millepora          | M75.2             |                   | Seq  | Bundegi, WA   | 1998 |
| A. millepora          | M76               |                   | SSCP | Bundegi, WA   | 1998 |
| <b>Zoox strain A</b>  |                   |                   |      |               |      |
| A. longicyathus       | J86               |                   | SSCP | Trunk         | 1998 |
| <b>Zoox strain E</b>  |                   |                   |      |               |      |
| Acropora sp. (s.s.)   | M227              | M226              | SSCP | Geoffrey Bay  | 2000 |
| Acropora sp. (i.s.)   | M226              | M227              | SSCP | Geoffrey Bay  | 2000 |
| A. millepora (s.s.)   | M229              | M228              | Seq  | Geoffrey Bay  | 2000 |
| A. millepora (s.s.)   | M231              | M230              | SSCP | Geoffrey Bay  | 2000 |
| A. millepora (s.s.)   | M237              | M236              | Seq  | Geoffrey Bay  | 2000 |
| A. millepora (s.s.)   | M245              | M244              | SSCP | Geoffrey Bay  | 2000 |
| A. millepora (s.s.)   | M287              | M286              | SSCP | Nelly Bay     | 2000 |
| A. millepora (s.s.)   | M289              | M288              | SSCP | Nelly Bay     | 2000 |
| A. millepora (s.s.)   | M291              | M290              | SSCP | Nelly Bay     | 2000 |
| A. millepora (s.s.)   | M295              | M294              | SSCP | Nelly Bay     | 2000 |
| A. pulchra (s.s.)     | M297              | M296              | SSCP | Nelly Bay     | 2000 |
| A. millepora (s.s.)   | M301              | M300              | SSCP | Nelly Bay     | 2000 |
| A. millepora (s.s.)   | M307              | M306              | SSCP | Nelly Bay     | 2000 |
| A. millepora (s.s.)   | M309              | M308              | SSCP | Nelly Bay     | 2000 |
| A. millepora          | M330              |                   | SSCP | Geoffrey Bay  | 2000 |
| A. millepora          | M378              |                   | Seq  | Nelly Bay     | 2000 |
| A. millepora          | M380              |                   | Seq  | Nelly Bay     | 2000 |
| A. millepora (i.s.)   | M228              | M229              | SSCP | Geoffrey Bay  | 2000 |
| A. millepora (i.s.)   | M230              | M231              | SSCP | Geoffrey Bay  | 2000 |
| A. millepora (i.s.)   | M236              | M237              | SSCP | Geoffrey Bay  | 2000 |
| A. millepora (i.s.)   | M244              | M245              | SSCP | Geoffrey Bay  | 2000 |
| A. millepora (i.s.)   | M286              | M287              | SSCP | Nelly Bay     | 2000 |
| A. millepora (i.s.)   | M288              | M289              | SSCP | Nelly Bay     | 2000 |
| A. millepora (i.s.)   | M290              | M291              | SSCP | Nelly Bay     | 2000 |
| A. millepora (i.s.)   | M294              | M295              | SSCP | Nelly Bay     | 2000 |
| A. pulchra (i.s.)     | M296              | M297              | SSCP | Nelly Bay     | 2000 |
| A. millepora (i.s.)   | M300              | M301              | SSCP | Nelly Bay     | 2000 |
| A. millepora (i.s.)   | M306              | M307              | SSCP | Nelly Bay     | 2000 |
| A. millepora (i.s.)   | M308              | M309              | SSCP | Nelly Bay     | 2000 |
| A. valida (s.s.)      | M251              | M250              | SSCP | Pioneer Bay   | 2000 |
| A. valida (s.s.)      | M253              | M252              | SSCP | Pioneer Bay   | 2000 |
| A. valida (s.s.)      | M261              | M260              | Seq  | Pioneer Bay   | 2000 |
| A. valida (s.s.)      | M267.1            | M267.2,<br>M266   | Seq  | Pioneer Bay   | 2000 |
| A. valida, (i.s.)     | M250              | M251              | SSCP | Pioneer Bay   | 2000 |
| A. valida, (i.s.)     | M252              | M253              | SSCP | Pioneer Bay   | 2000 |
| A. valida, (i.s.)     | M260              | M261              | SSCP | Pioneer Bay   | 2000 |
| A. valida, (i.s.)     | M266              | M267.1,<br>M267.2 | SSCP | Pioneer Bay   | 2000 |
| Acropora sp. (i.s.)   | M312              |                   | SSCP | Nelly Bay     | 2000 |
